# Supplementary material for: Rusted iron wire waste into high performance anode (α-Fe2O3) for Li-ion batteries: an efficient waste management approach
Source: Royal Society of Chemistry journal article supplement (doi:10.1039/c5gc01747e), 2015-10-16
Supplement: c5gc01747e1.pdf [file c5gc01747e1.pdf]

Electronic Supplementary Information (ESI)

**Rusted iron wire waste in to high performance anode ( $\alpha$ -Fe<sub>2</sub>O<sub>3</sub>) for  
Li-ion battery: An efficient waste management approach**

Dattakumar Mhamane,<sup>a</sup> Hyun-Kyung Kim<sup>a</sup> Vanchiappan Aravindan,<sup>b,\*</sup> Kwang Chul Roh,<sup>c</sup> Madhavi  
Srinivasan<sup>b,d,\*</sup> and Kwang-Bum Kim<sup>a,\*</sup>

<sup>a</sup>*Department of Materials Science and Engineering, Yonsei University, 134 Shinchon-dong, Seodaemun-gu, Seoul 120-749, Republic of Korea. Tel: +82-2-3657745, E-mail: [kbkim@yonsei.ac.kr](mailto:kbkim@yonsei.ac.kr)*

<sup>b</sup>*Energy Research Institute @ NTU (ERI@N), Research techno Plaza, Nanyang Technological University, Singapore 637553, Singapore. Email: [aravind\\_van@yahoo.com](mailto:aravind_van@yahoo.com)*

<sup>c</sup>*Energy Efficient Materials Team, Energy & Environmental Division Korea Institute of Ceramic Engineering & Technology 101, Soho-ro, Jinju 660-031, Republic of Korea.*

<sup>d</sup>*School of Materials Science and Engineering, Nanyang Technological University, Singapore 639798, Singapore. Email: [madhavi@ntu.edu.sg](mailto:madhavi@ntu.edu.sg)*

**Table S1: Comparison of Li/ $\alpha$ -Fe<sub>2</sub>O<sub>3</sub> half-cell results with literature reports.**

| Morphology                                                     | Capacity<br>(Cycle)<br>-1<br>mAh g            | Current<br>rate<br>(A g <sup>-1</sup> ) | Electrode<br>Composition<br>(AM:SP:B) <sup>*</sup> | Reference |
|----------------------------------------------------------------|-----------------------------------------------|-----------------------------------------|----------------------------------------------------|-----------|
| Interconnected $\alpha$ -Fe <sub>2</sub> O <sub>3</sub><br>NPs | > 1400<br>(79)                                | 0.1                                     | 40:50:10                                           | This work |
| Interconnected $\alpha$ -Fe <sub>2</sub> O <sub>3</sub><br>NPs | ~800<br>(215)                                 | 0.2                                     | 60:30:10                                           | This work |
| Elongated                                                      | 840 (40)                                      | 0.1                                     | 70:15:15                                           | 17        |
| Hollow Nanofibers                                              | ~ 1293<br>(40)                                | 0.06                                    | 30:50:20                                           | 21        |
| Nanorods                                                       | ~ 900 (30)                                    | 0.2                                     | 60:20:20                                           | 22        |
| Discs                                                          | ~550<br>(100)                                 | 0.1                                     | 50:25:25                                           | 23        |
| Spindles                                                       | 911 (50)                                      | 0.2                                     | 80:10:10                                           | 24        |
| Mesoporous                                                     | 1293 (50)                                     | 0.1                                     | 50:40:10                                           | 30        |
| Spindles                                                       | ~900 (40)                                     | 0.1                                     | 30:50:20                                           | 39        |
| Nanofibers                                                     | ~1095<br>(50)                                 | 0.05                                    | 70:15:15                                           | 41        |
| Cubes                                                          | 458 (100)<br>(hollow)<br>177 (100)<br>(solid) | 0.1                                     | 70:20:10                                           | 42        |
| Nanospindles<br>Hollow                                         | 456 (100)                                     | 0.1                                     | 75:15:10                                           | 43        |
| Nanorods array                                                 | 562 (50)                                      | 0.2                                     | 75:15:10                                           | 44        |
| Nanotubes                                                      | 510 (50)                                      | 0.1                                     | 85:10:5                                            | 45        |
| Spheres                                                        | 863 (50)                                      | 0.1                                     | ---                                                | 46        |
| Spheres                                                        | 710 (100)<br>340 (100)                        | 0.2                                     | 70:20:10                                           | 47        |
| Melon like                                                     | 662 (100)                                     | 0.2                                     | 70:20:10                                           | 48        |

AM: Active material, SP: Carbon Black (Super-P), B: Binder

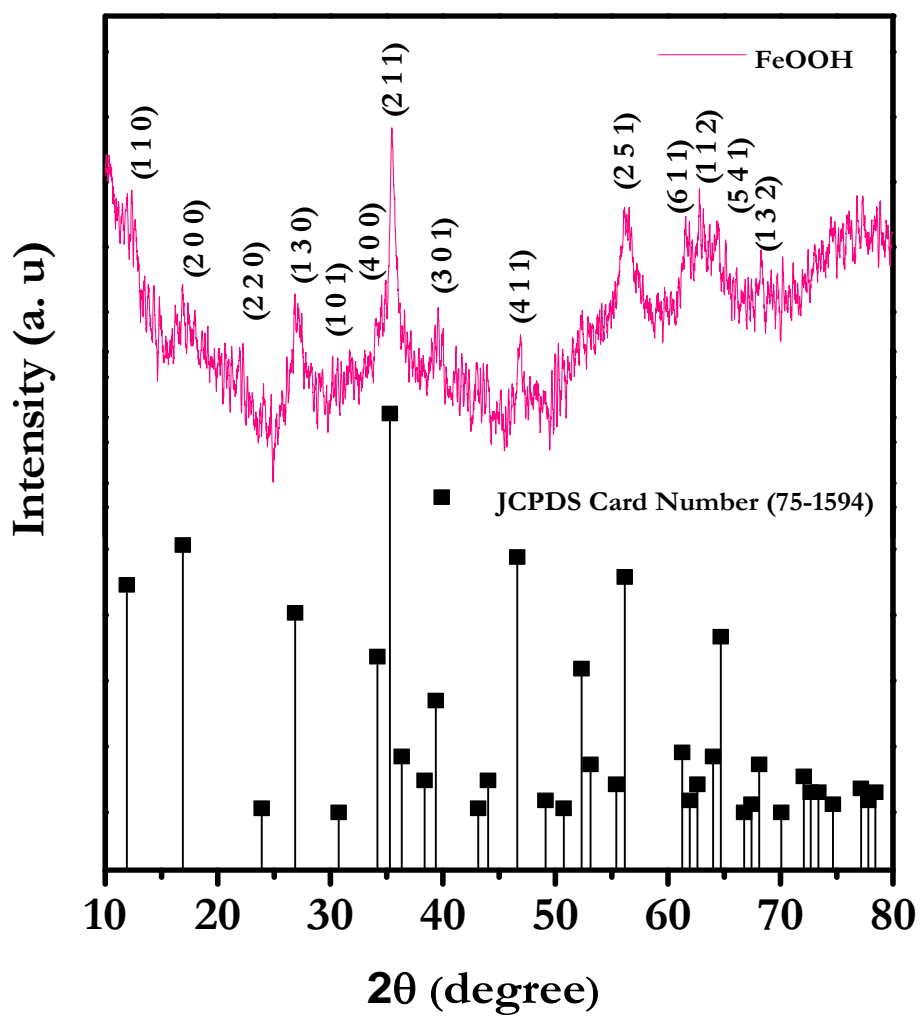

**Figure S1:** X-ray diffraction plot for intermediate FeOOH.

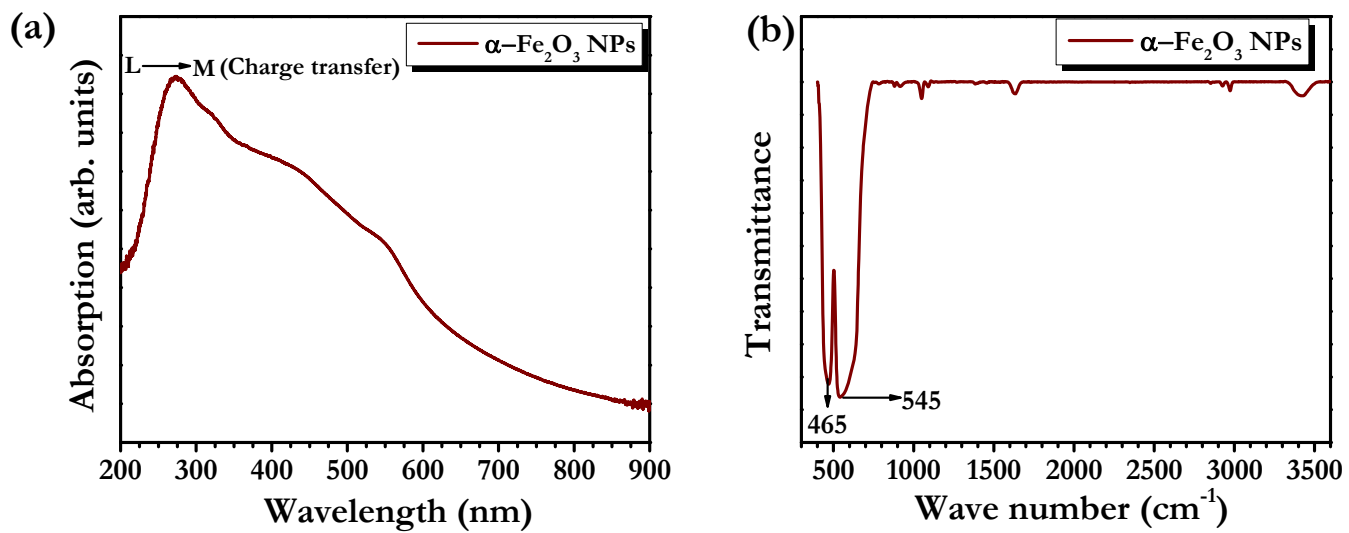

Figure S2: (a) UV-visible absorption plot and (b) Raman plot for  $\alpha\text{-Fe}_2\text{O}_3$  NPs.

## ICP-AES analysis for rust scratched from rusted wires (precursor) and final $\alpha$ -Fe<sub>2</sub>O<sub>3</sub> NPs.

### Sample preparation for ICP-AES analysis

A particular amount of rust (scratched from rusted wire) is dissolved in (3 mL) aqua regia and 1 mL conc. H<sub>2</sub>O<sub>2</sub> followed by microwave digestion treatment. Then, the sample was collected by diluting the solution up to 50 mL with D. I. water that was named as the stock solution. This solution was used to detect possible metal impurities such as Cu, Al, Cr and Ni. However, for the detection of Fe the stock solution was further diluted 100 times by D. I. water. In case of  $\alpha$ -Fe<sub>2</sub>O<sub>3</sub> NPs, the sample preparation was similar to above discussed process except 3 mL conc. HNO<sub>3</sub> was added instead of 3 mL aqua regia.

Table S2

| Samples                                                        | Fe (Fe <sub>2</sub> O <sub>3</sub> )<br>wt. % | Cu (CuO)<br>wt. % | Al (Al <sub>2</sub> O <sub>3</sub> )<br>wt. % | Cr (CrO <sub>2</sub> )<br>wt. % | Ni (NiO)<br>wt. %  | Total Metal<br>wt. % |
|----------------------------------------------------------------|-----------------------------------------------|-------------------|-----------------------------------------------|---------------------------------|--------------------|----------------------|
| Precursor<br>(Rust Scratched<br>from rusted<br>wires)          | 90.99<br>(63.27)                              | 0.058<br>(0.72)   | 0.3961<br>(0.7471)                            | 0.023<br>(0.48)                 | 0.0225<br>(0.028)  | 91.4896              |
| Interconnected<br>$\alpha$ -Fe <sub>2</sub> O <sub>3</sub> NPs | 98.35<br>(68.764)                             | 0.004<br>(0.005)  | 0.0132<br>(0.0249)                            | 0.0034<br>(0.007)               | 0.0130<br>(0.0162) | 98.3836              |

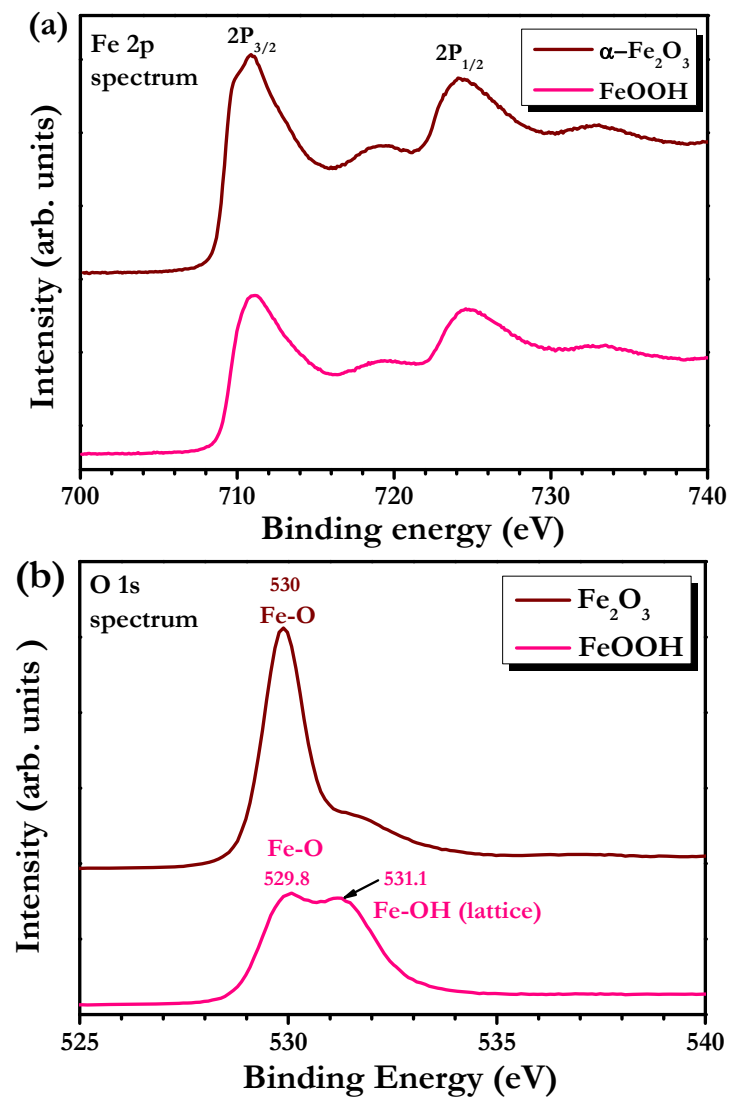

**Figure S3:** (a) Fe2p XPS plots for  $\alpha\text{-Fe}_2\text{O}_3$  and FeOOH and b) O1s XPS plots for  $\alpha\text{-Fe}_2\text{O}_3$  and FeOOH.

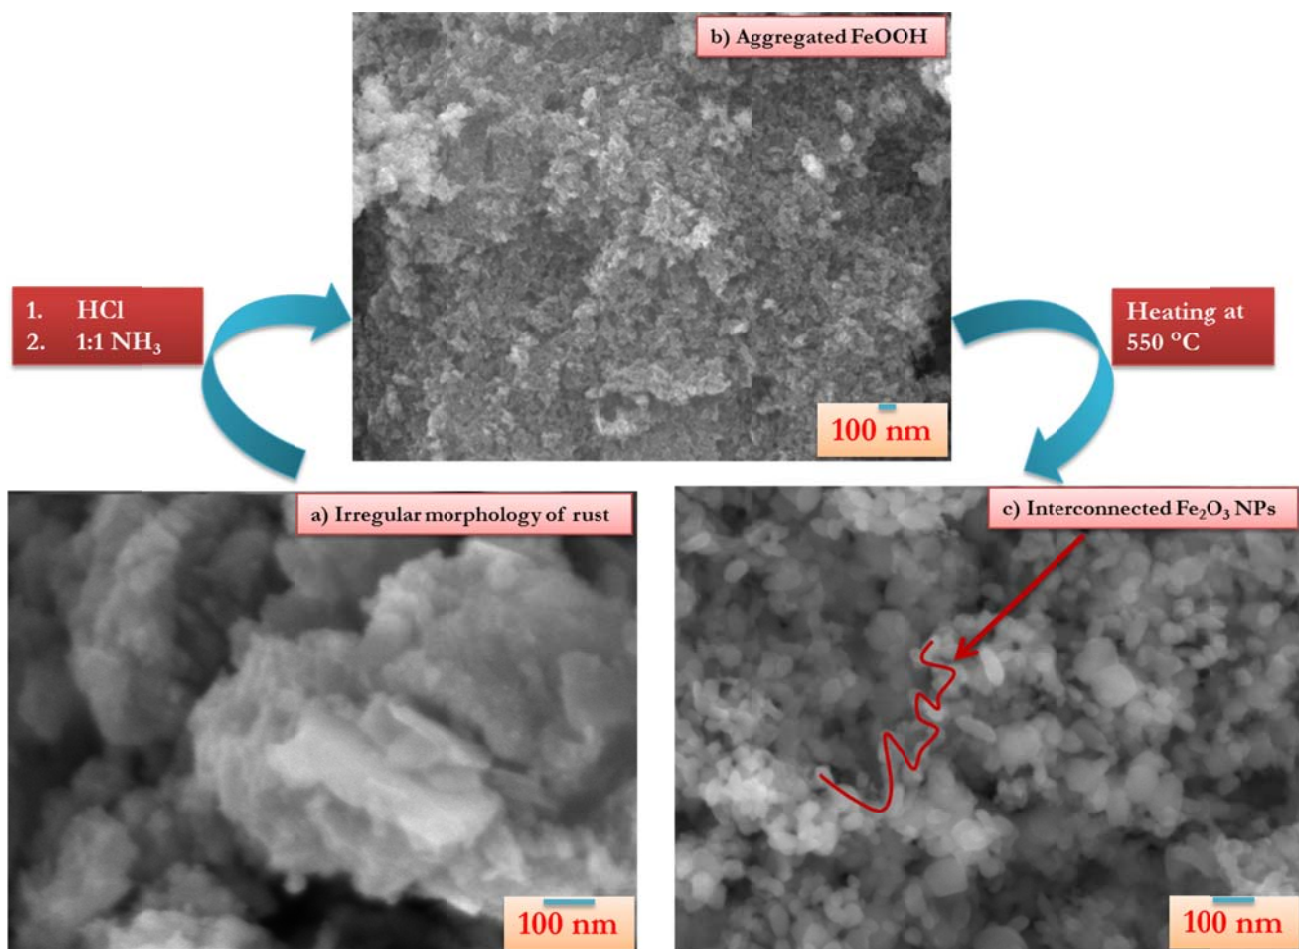

**Figure S4:** (a) FESEM images for a) Rust (scratched from rusted wire) b) Intermediate ( $\text{FeOOH}$ ) and c) Interconnected  $\alpha$ - $\text{Fe}_2\text{O}_3$  NPs.

### EDAX analysis for $\alpha$ -Fe<sub>2</sub>O<sub>3</sub> NPs.

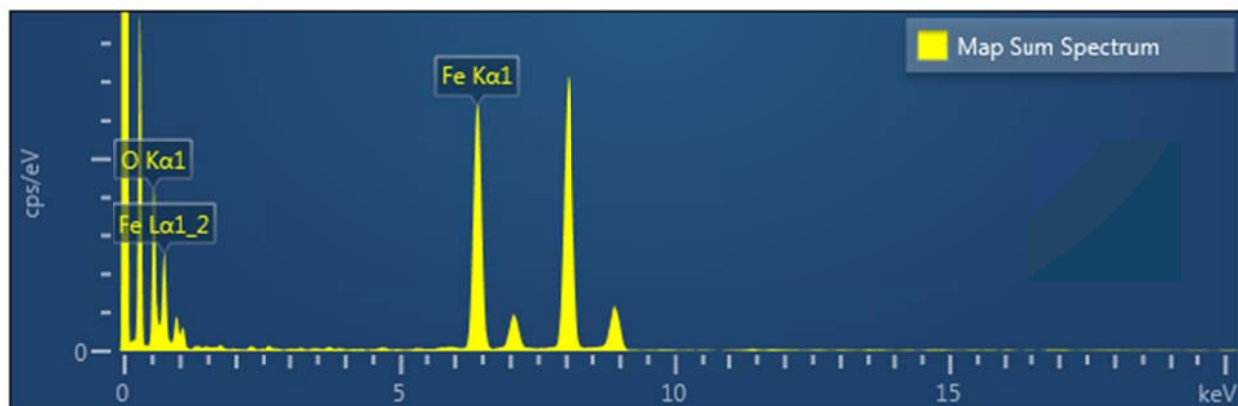

Figure S5 EDAX plot for  $\alpha$ -Fe<sub>2</sub>O<sub>3</sub> NPs

Table S3: EDAX analysis summary

| Element       | Line Type | k factor | Absorption Correction | Wt. %  | Wt. % Sigma | Atomic % |
|---------------|-----------|----------|-----------------------|--------|-------------|----------|
| O             | K series  | 2.13875  | 1.00                  | 32.15  | 1.66        | 62.32    |
| Fe            | K series  | 1.04302  | 1.00                  | 67.85  | 1.66        | 37.68    |
| <b>Total:</b> |           |          |                       | 100.00 |             | 100.00   |



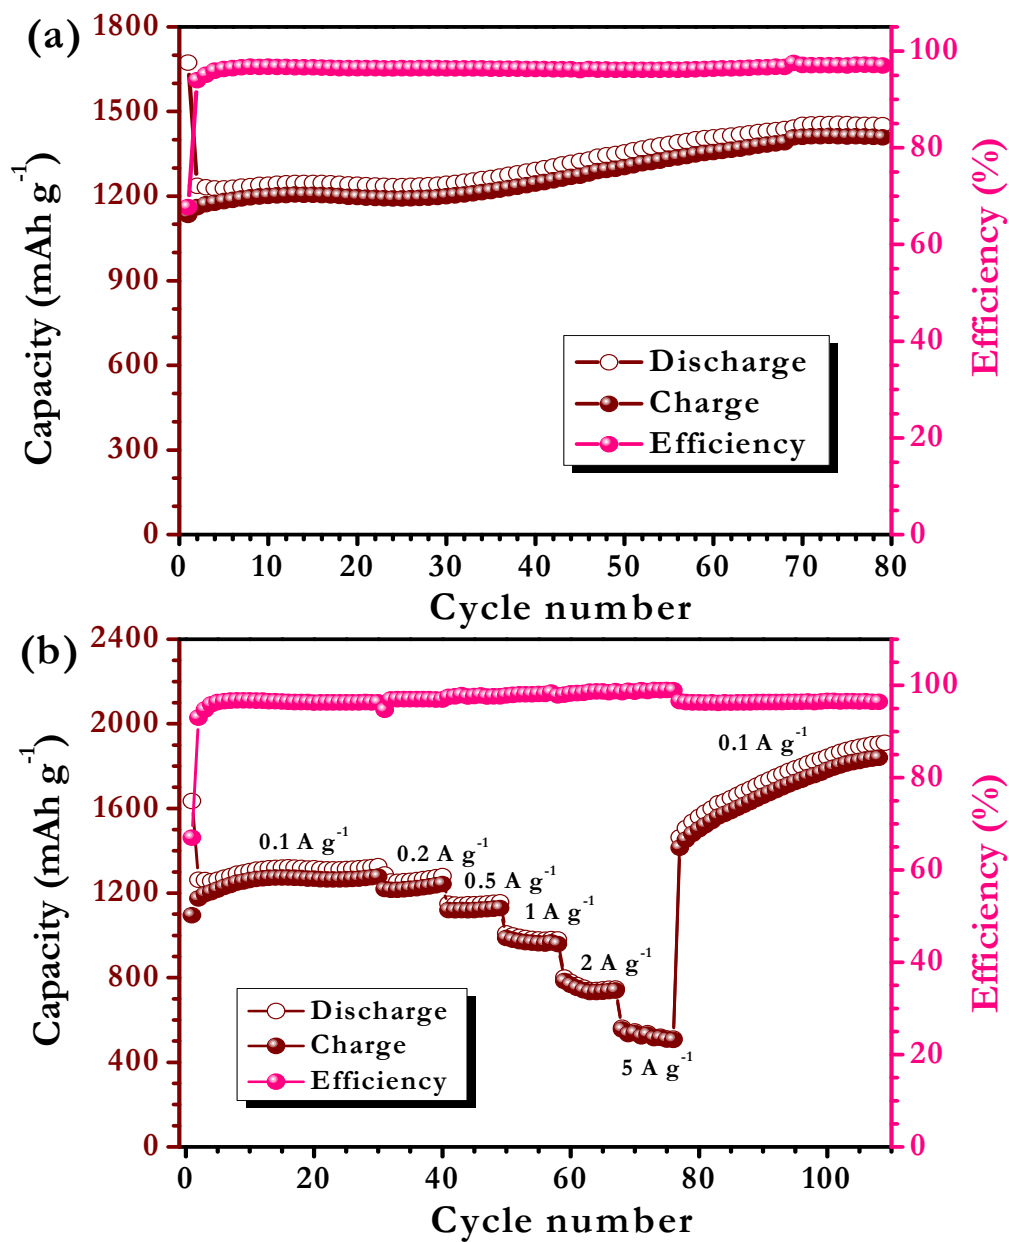

**Figure S6:** (a) Capacity *vs.* cycle number plot for Li/α-Fe<sub>2</sub>O<sub>3</sub> half-cell (Electrode composition: 40:50:10) at current density of 0.1 A g<sup>-1</sup>, b) Rate capability plot for Li/α-Fe<sub>2</sub>O<sub>3</sub> half-cell at various current densities.

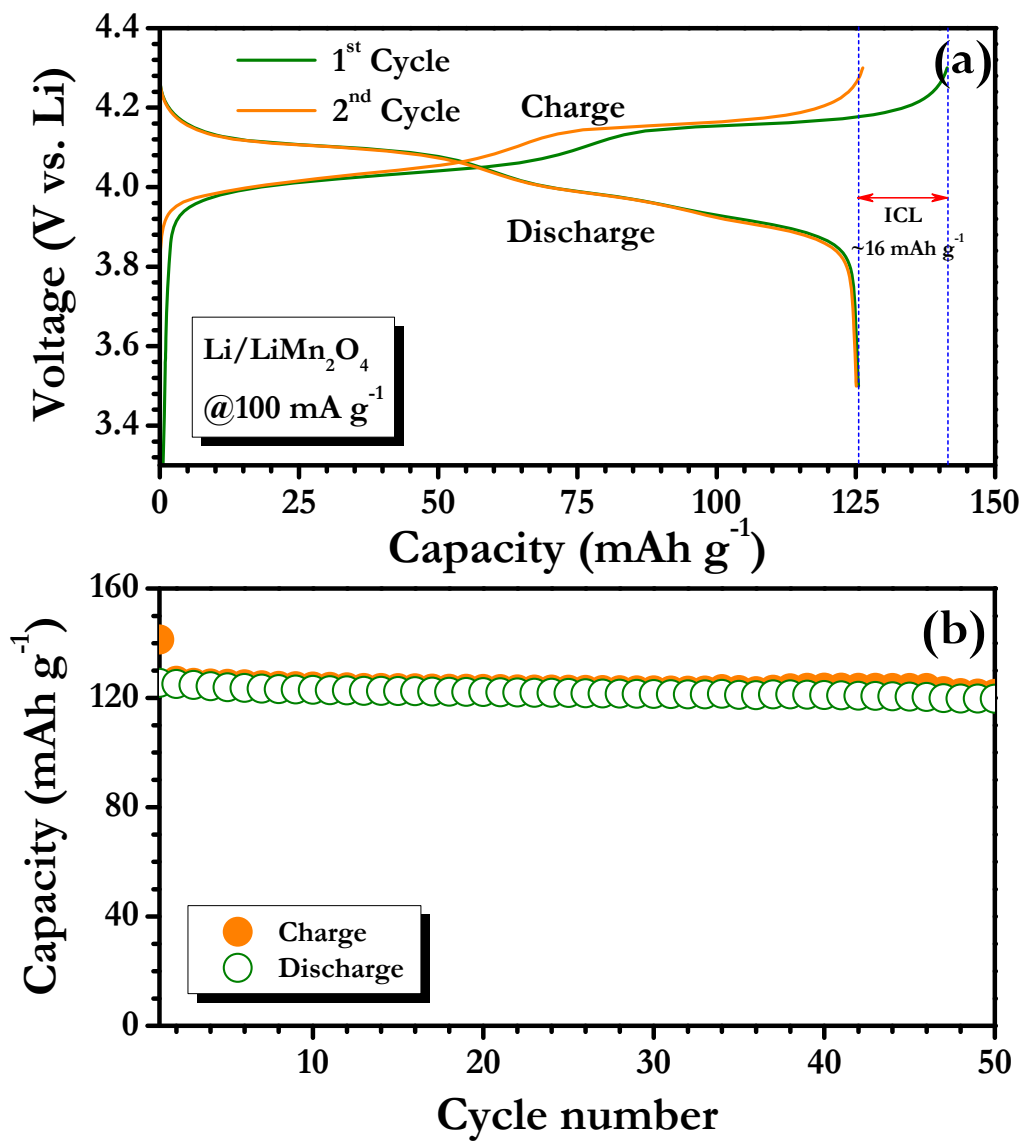

**Figure S7.** (a) Typical galvanostatic charge-discharge curves of Li/LiMn<sub>2</sub>O<sub>4</sub> (Merck KGaA, Germany) at current density of 0.1 A g<sup>-1</sup> between 3.5-4.3 V *vs.* Li in ambient temperature conditions, and (b) Plot of capacity *vs.* cycle number

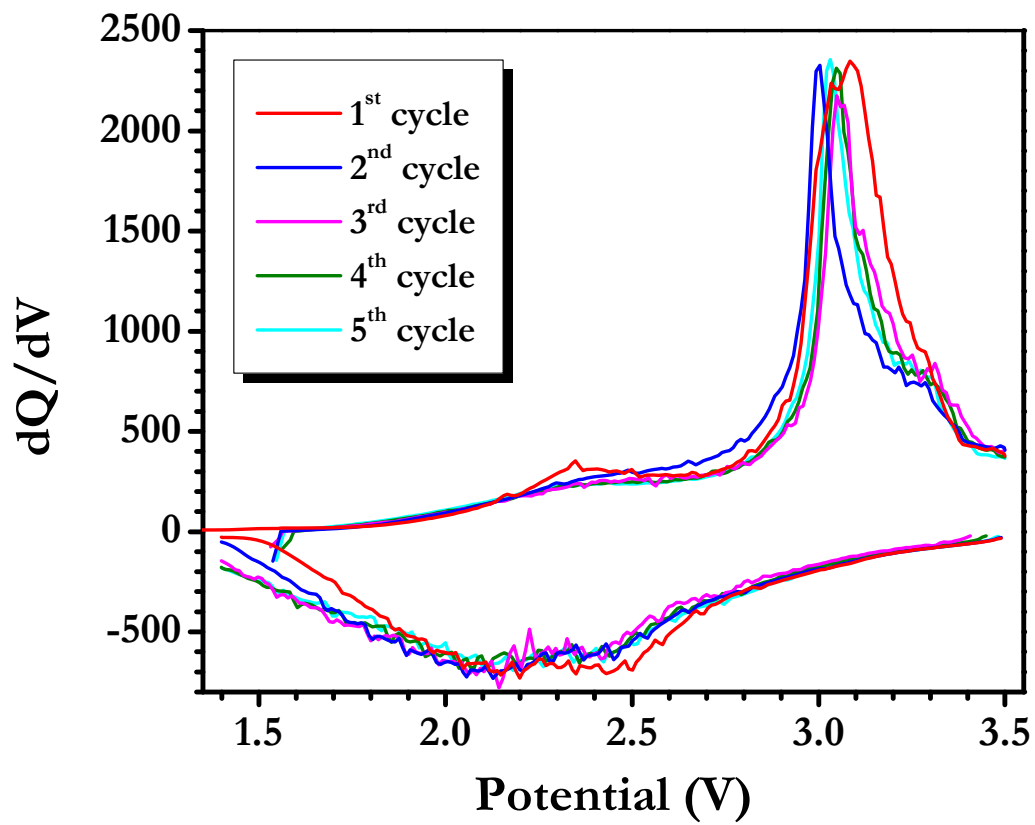

**Figure S8.** Differential capacity profile of  $\text{LiMn}_2\text{O}_4/\alpha\text{-Fe}_2\text{O}_3$  NPs cells cycled at current density of  $0.1 \text{ A g}^{-1}$ .

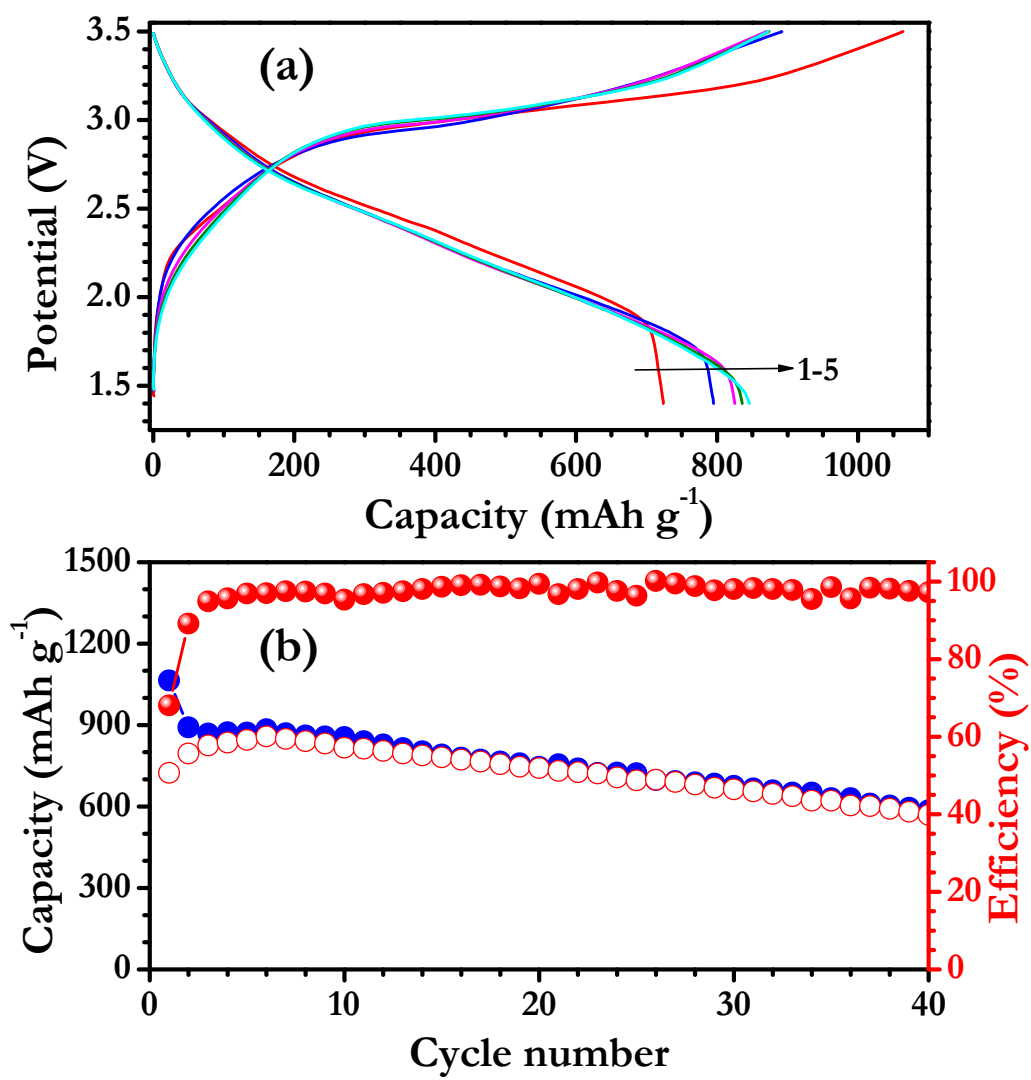

**Figure S9.** Galvanostatic charge–discharge curves for LiMn<sub>2</sub>O<sub>4</sub>/α-Fe<sub>2</sub>O<sub>3</sub> NPs (pre-treated) (Electrode composition: 40:50:10) full cell at a current density of 0.1 A g<sup>-1</sup>, (b) Plot of specific capacity *vs.* cycle number plot for LiMn<sub>2</sub>O<sub>4</sub>/α-Fe<sub>2</sub>O<sub>3</sub> NPs (pre-treated) full cell at 0.1 A g<sup>-1</sup>.
